# Supplementary material for: Early Childhood Reading in Rural China and Obstacles to Caregiver Investment in Young Children: A Mixed-Methods Analysis
Source: MDPI journal article supplement (doi:10.3390/ijerph18041457), 2021-02-04
Supplement: s1 [file s1]

## Supplementary Material

**Table S1. Perceived Importance and Knowledge of Reading Practices among Caregivers  
(N = 1748)**

| Variable                                 | N (%)     |
|------------------------------------------|-----------|
| Perceived importance of reading to child |           |
| (1) Totally unimportant                  | 58 (3%)   |
| (2) Unimportant                          | 129 (7%)  |
| (3) Relatively unimportant               | 165 (9%)  |
| (4) Neutral                              | 479 (27%) |
| (5) Relatively important                 | 465 (27%) |
| (6) Important                            | 370 (21%) |
| (7) Extremely important                  | 82 (5%)   |
| Do you know how to read to your child?   |           |
| (8) Not at all                           | 215 (12%) |
| (9) Not confident                        | 231 (13%) |
| (10) A little unconfident                | 155 (9%)  |
| (11) Neutral                             | 335 (19%) |
| (12) A little confident                  | 323 (18%) |
| (13) Confident                           | 209 (12%) |
| (14) Absolutely confident                | 280 (16%) |

Data Source: Authors' survey Note:

- (i) The sample size N = 1748 refers to 1748 caregiver-child dyads included in the study.
- (ii) The answer choices followed a 7-point Likert scale, with 1 being "unimportant" or "not knowledgeable at all" and 7 being "extremely important" or "absolutely knowledgeable"
